# Supplementary material for: MACHOS: Markov clusters of homologous subsequences
Source: PubMed Central journal article supplement — Bioinformatics. 2008 Jul 1;24(13):i77–85. doi: 10.1093/bioinformatics/btn144 (PMC2718622; doi:10.1093/bioinformatics/btn144), 2008-07-01
Supplement: btn144_1.pdf [file btn144_1.pdf]

**Supplemental Table 1.** List of PSFs that fail to overlap any MaCHoS by 50% (at  $I=1.6$ ).

| Interpro ID (Pfam) | Pfam family description                                                | Coverage in residues | # proteins containing domain |
|--------------------|------------------------------------------------------------------------|----------------------|------------------------------|
| IPR000031          | 1-(5-Phosphoribosyl)-5-amino-4-imidazole-carboxylate (AIR) carboxylase | 1057                 | 5                            |
| IPR000128          | Progesterone receptor, N-terminal                                      | 2722                 | 6                            |
| IPR000206          | Ribosomal protein L7/L12                                               | 150                  | 1                            |
| IPR000212          | DNA helicase, UvrD/REP type                                            | 2070                 | 3                            |
| IPR000310          | Orn/Lys/Arg decarboxylase, major region                                | 398                  | 1                            |
| IPR000327          | POU-specific                                                           | 6214                 | 52                           |
| IPR000353          | MHC class II, beta chain, N-terminal                                   | 2929                 | 30                           |
| IPR000523          | Magnesium chelatase, ChII subunit                                      | 4940                 | 16                           |
| IPR000534          | Semialdehyde dehydrogenase, NAD - binding                              | 367                  | 1                            |
| IPR000536          | Nuclear hormone receptor, ligand-binding, core                         | 24482                | 198                          |
| IPR000612          | Protein of unknown function UPF0057                                    | 357                  | 4                            |
| IPR000622          | K-Cl Co-transporter, type 1                                            | 1700                 | 8                            |
| IPR000757          | Glycoside hydrolase, family 16                                         | 2596                 | 6                            |
| IPR000802          | Arsenical pump membrane protein                                        | 1256                 | 2                            |
| IPR000848          | cAMP-type GPCR                                                         | 1083                 | 3                            |
| IPR000851          | Ribosomal protein S5                                                   | 901                  | 2                            |
| IPR000876          | Ribosomal protein S4e                                                  | 261                  | 1                            |
| IPR000877          | Proteinase inhibitor I12, Bowman-Birk                                  | 470                  | 1                            |
| IPR000896          | Hemocyanin, copper-containing                                          | 3916                 | 7                            |
| IPR000903          | Myristoyl-CoA:protein N-myristoyltransferase                           | 4439                 | 11                           |
| IPR000961          | Protein kinase, C-terminal                                             | 13506                | 184                          |
| IPR000976          | Wilm's tumour protein                                                  | 1040                 | 3                            |
| IPR000990          | Innexin                                                                | 3439                 | 9                            |
| IPR001083          | Copper fist DNA-binding                                                | 919                  | 2                            |
| IPR001139          | Glycoside hydrolase, family 30                                         | 2541                 | 5                            |
| IPR001155          | NADH:flavin oxidoreductase/NADH oxidase, N-terminal                    | 748                  | 2                            |
| IPR001217          | STAT transcription factor, core                                        | 643                  | 1                            |
| IPR001220          | Legume lectin, beta domain                                             | 256                  | 1                            |
| IPR001289          | CCAAT-binding transcription factor, subunit B                          | 546                  | 4                            |
| IPR001292          | Oestrogen receptor, AF1 modulatory                                     | 700                  | 3                            |
| IPR001305          | DnaJ central region                                                    | 3185                 | 24                           |
| IPR001352          | Ribonuclease HII/HIII                                                  | 1584                 | 6                            |
| IPR001383          | Ribosomal protein L28                                                  | 258                  | 1                            |
| IPR001466          | Beta-lactamase                                                         | 1803                 | 4                            |
| IPR001529          | DNA-directed RNA polymerase, M/15 kDa subunit                          | 874                  | 9                            |
| IPR001531          | Phospholipase C, zinc-binding, prokaryotic                             | 100                  | 1                            |
| IPR001573          | Protein kinase A anchoring region                                      | 4347                 | 8                            |
| IPR001602          | Protein of unknown function UPF0047                                    | 266                  | 1                            |
| IPR001628          | Zinc finger, nuclear hormone receptor-type                             | 22664                | 209                          |
| IPR001638          | Bacterial extracellular solute-binding protein, family 3               | 756                  | 3                            |

|           |                                                  |       |    |
|-----------|--------------------------------------------------|-------|----|
| IPR001708 | 60 kDa inner membrane insertion protein          | 2709  | 10 |
| IPR001721 | Threonine dehydratase, C-terminal                | 197   | 1  |
| IPR001765 | Carbonic anhydrase                               | 255   | 1  |
| IPR001774 | Delta/Serrate/lag-2 (DSL) protein                | 1619  | 16 |
| IPR001888 | Transposase, type 1                              | 101   | 1  |
| IPR001893 | Cysteine rich repeat                             | 4264  | 4  |
| IPR001904 | Paxillin                                         | 1583  | 6  |
| IPR001975 | Ribosomal protein L40e                           | 410   | 8  |
| IPR002079 | Gag polyprotein, inner coat protein p12          | 385   | 2  |
| IPR002091 | Aromatic amino acid permease                     | 416   | 1  |
| IPR002489 | Glutamate synthase, alpha subunit, C-terminal    | 3089  | 2  |
| IPR002494 | Keratin, high sulphur B2 protein                 | 14103 | 92 |
| IPR002509 | Polysaccharide deacetylase                       | 2810  | 10 |
| IPR002544 | FMRFamide-related peptide                        | 215   | 1  |
| IPR002602 | Protein of unknown function DB                   | 570   | 1  |
| IPR002651 | Protein of unknown function DUF32                | 5784  | 19 |
| IPR002656 | Acyltransferase 3                                | 7840  | 18 |
| IPR002668 | Na <sup>+</sup> dependent nucleoside transporter | 2154  | 11 |
| IPR002677 | Ribosomal protein L32p                           | 638   | 5  |
| IPR002695 | AICARFT/IMPCHase bienzyme                        | 506   | 1  |
| IPR002717 | MOZ/SAS-like protein                             | 7233  | 24 |
| IPR002719 | Retinoblastoma-associated protein, B-box         | 7253  | 12 |
| IPR002720 | Retinoblastoma-associated protein, A-box         | 6547  | 12 |
| IPR002828 | Survival protein SurE                            | 336   | 1  |
| IPR002922 | Thiamine biosynthesis Thi4 protein               | 1523  | 7  |
| IPR002932 | Glutamate synthase, central-C                    | 3385  | 3  |
| IPR002989 | Mycobacterial pentapeptide repeat                | 947   | 2  |
| IPR003002 | 7TM chemoreceptor, subfamily 1                   | 3716  | 12 |
| IPR003020 | Bicarbonate transporter, eukaryotic              | 729   | 2  |
| IPR003090 | Alpha-crystallin, N-terminal                     | 350   | 5  |
| IPR003101 | Coactivator CBP, KIX                             | 1276  | 8  |
| IPR003115 | ParB-like nuclease                               | 127   | 1  |
| IPR003142 | Biotin protein ligase, C-terminal                | 2749  | 5  |
| IPR003149 | Iron hydrogenase, small subunit-like             | 958   | 2  |
| IPR003156 | Phosphoesterase, DHHA1                           | 803   | 5  |
| IPR003163 | DNA-binding, yeast                               | 1692  | 4  |
| IPR003306 | WIF domain                                       | 1599  | 10 |
| IPR003327 | Leucine zipper, Myc                              | 375   | 3  |
| IPR003333 | Cyclopropane-fatty-acyl-phospholipid synthase    | 587   | 2  |
| IPR003351 | Dishevelled protein                              | 1538  | 11 |
| IPR003368 | Polymorphic membrane protein, Chlamydia          | 286   | 3  |
| IPR003379 | Conserved carboxylase region                     | 1937  | 6  |
| IPR003460 | Insect antifreeze protein                        | 298   | 3  |
| IPR003543 | Macrophage scavenger receptor                    | 267   | 3  |
| IPR003605 | TGF beta receptor, GS motif                      | 2272  | 31 |
| IPR003611 | Intron-encoded nuclease 2                        | 341   | 1  |
| IPR003702 | Acetyl-CoA hydrolase/transferase                 | 1003  | 2  |
| IPR003703 | Acyl-CoA thioesterase                            | 1495  | 5  |
| IPR003734 | Protein of unknown function DUF155               | 2583  | 8  |
| IPR003769 | Adaptor protein ClpS, core                       | 2989  | 10 |
| IPR003774 | Protein of unknown function DUF179               | 218   | 2  |
| IPR003778 | Allophanate hydrolase subunit 2                  | 424   | 1  |

|           |                                                                         |        |     |
|-----------|-------------------------------------------------------------------------|--------|-----|
| IPR003833 | Allophanate hydrolase subunit 1                                         | 402    | 1   |
| IPR003937 | Potassium channel, voltage dependent, KCNQ                              | 302    | 1   |
| IPR004009 | Myosin, N-terminal, SH3-like                                            | 5416   | 74  |
| IPR004060 | Orexin receptor, type 2                                                 | 222    | 3   |
| IPR004101 | Mur ligase, C-terminal                                                  | 319    | 2   |
| IPR004102 | Poly(ADP-ribose) polymerase, regulatory region                          | 4249   | 10  |
| IPR004108 | Iron hydrogenase, large subunit, C-terminal                             | 3454   | 8   |
| IPR004115 | GAD                                                                     | 1331   | 3   |
| IPR004118 | TT viral ORF2 protein                                                   | 117    | 1   |
| IPR004126 | Phospholipase A2 inhibitor                                              | 314    | 2   |
| IPR004136 | 2-nitropropane dioxygenase, NPD                                         | 2413   | 5   |
| IPR004167 | E3 binding                                                              | 2703   | 14  |
| IPR004181 | Zinc finger, MIZ-type                                                   | 8910   | 27  |
| IPR004191 | Integrase, Tn916-type, N-terminal DNA binding                           | 2057   | 8   |
| IPR004193 | Glycoside hydrolase, family 13, N-terminal                              | 2180   | 8   |
| IPR004206 | mRNA capping enzyme, beta chain                                         | 869    | 2   |
| IPR004244 | Transposase, L1                                                         | 128701 | 398 |
| IPR004276 | Glycosyl transferase, family 28                                         | 242    | 1   |
| IPR004740 | Nucleoside:H <sup>+</sup> symporter                                     | 486    | 1   |
| IPR004792 | HI0933-like protein                                                     | 1289   | 5   |
| IPR004813 | Oligopeptide transporter OPT superfamily                                | 2401   | 3   |
| IPR004834 | Chitin synthase                                                         | 938    | 2   |
| IPR004859 | Putative 5-3 exonuclease                                                | 6859   | 10  |
| IPR004860 | LAGLIDADG DNA endonuclease                                              | 654    | 3   |
| IPR004874 | Borrelia repeat protein                                                 | 308    | 1   |
| IPR004886 | Glycolipid anchored surface protein GAS1                                | 1871   | 5   |
| IPR004911 | Gamma interferon inducible lysosomal thiol reductase GILT               | 1334   | 7   |
| IPR004918 | Cdc37                                                                   | 304    | 1   |
| IPR004923 | Iron permease FTR1                                                      | 869    | 2   |
| IPR004962 | Mab-21 protein                                                          | 1810   | 5   |
| IPR004979 | Transcription factor AP-2                                               | 266    | 1   |
| IPR005016 | TMS membrane protein/tumour differentially expressed protein            | 9914   | 22  |
| IPR005100 | Supt5 repeat                                                            | 4523   | 5   |
| IPR005106 | Aspartate/homoserine dehydrogenase, NAD-binding                         | 765    | 3   |
| IPR005109 | Anp1                                                                    | 1430   | 3   |
| IPR005117 | Nitrite/sulphite reductase, hemoprotein beta-component, ferredoxin-like | 487    | 1   |
| IPR005139 | PCRF                                                                    | 1817   | 8   |
| IPR005145 | SUA5                                                                    | 362    | 1   |
| IPR005155 | Ribosome biogenesis factor NIP7-like                                    | 181    | 1   |
| IPR005180 | Protein of unknown function DUF302                                      | 203    | 1   |
| IPR005185 | Protein of unknown function DUF307                                      | 908    | 1   |
| IPR005194 | Glycoside hydrolase, family 65, C-terminal                              | 532    | 1   |
| IPR005196 | Glycoside hydrolase family 65, N-terminal                               | 420    | 1   |
| IPR005200 | Glycoside hydrolase, family 81                                          | 1496   | 2   |
| IPR005240 | Protein of unknown function DUF389                                      | 1314   | 2   |

|           |                                                                          |       |    |
|-----------|--------------------------------------------------------------------------|-------|----|
| IPR005312 | Protein of unknown function DUF1759                                      | 87    | 1  |
| IPR005480 | Carbamoyl-phosphate synthetase large chain, oligomerisation              | 4351  | 10 |
| IPR005514 | Protein of unknown function DUF316                                       | 561   | 2  |
| IPR005515 | Vitelline membrane outer layer protein I (VOMI)                          | 604   | 3  |
| IPR005529 | Protein of unknown function DUF321                                       | 852   | 1  |
| IPR005560 | Protein of unknown function DUF326                                       | 59    | 1  |
| IPR005567 | Fushi tarazu, N-terminal                                                 | 254   | 1  |
| IPR005575 | Statherin                                                                | 62    | 1  |
| IPR005600 | Gal4-like dimerisation domain                                            | 616   | 1  |
| IPR005634 | Male specific sperm protein                                              | 369   | 3  |
| IPR005798 | Cytochrome b/b6, C-terminal                                              | 768   | 4  |
| IPR005839 | Protein of unknown function UPF0004                                      | 794   | 2  |
| IPR006031 | XYPPX repeat                                                             | 437   | 2  |
| IPR006067 | Nitrite and sulphite reductase 4Fe-4S region                             | 568   | 1  |
| IPR006124 | Metalloenzyme                                                            | 239   | 1  |
| IPR006149 | Nematode-specific EB region                                              | 541   | 3  |
| IPR006190 | Antifreeze-like/N-acetylneuraminic acid synthase C-terminal              | 96    | 1  |
| IPR006218 | DAHP synthetase I/KDSA                                                   | 740   | 2  |
| IPR006231 | Malate:quinone-oxidoreductase                                            | 6227  | 3  |
| IPR006297 | GTP-binding protein LepA                                                 | 117   | 1  |
| IPR006530 | YD repeat                                                                | 10871 | 22 |
| IPR006588 | Protein of unknown function PAW                                          | 547   | 3  |
| IPR006611 | Protein of unknown function DUF1431, cysteine-rich, Drosophila           | 2023  | 11 |
| IPR006711 | Hox9 activation region                                                   | 2503  | 11 |
| IPR006718 | Dec-1 repeat                                                             | 1707  | 2  |
| IPR006719 | DEC-1 protein, N-terminal                                                | 1970  | 2  |
| IPR006720 | Dec-1 protein, C-terminal                                                | 1707  | 2  |
| IPR006742 | Yeast mating factor alpha hormone                                        | 285   | 2  |
| IPR006763 | Erythrocyte membrane-associated giant protein antigen 332                | 56    | 1  |
| IPR006774 | BAF1 / ABF1 chromatin reorganising factor                                | 731   | 1  |
| IPR006794 | Zfx / Zfy transcription activation region                                | 3759  | 12 |
| IPR006809 | TAFII28-like protein                                                     | 1609  | 9  |
| IPR006820 | Caudal-like activation region                                            | 1734  | 9  |
| IPR006821 | Intermediate filament, DNA-binding region                                | 2637  | 24 |
| IPR006828 | 5-AMP-activated protein kinase, beta subunit, complex-interacting region | 2672  | 10 |
| IPR006847 | Translation initiation factor IF-2, N-terminal                           | 92    | 1  |
| IPR006898 | Hepatocyte nuclear factor 1, alpha isoform C-terminal                    | 531   | 5  |
| IPR006899 | Hepatocyte nuclear factor 1, N-terminal                                  | 3593  | 10 |
| IPR006903 | Protein of unknown function DUF618                                       | 5245  | 18 |
| IPR006947 | EGF-like, alliinase                                                      | 47    | 1  |
| IPR006953 | Uso1/p115 like vesicle tethering protein, head region                    | 3643  | 5  |
| IPR006955 | Uso1/p115 like vesicle tethering protein, C-terminal                     | 3830  | 5  |
| IPR006982 | Glutamate synthase, central-N                                            | 3089  | 2  |
| IPR007073 | RNA polymerase Rpb1, domain 7                                            | 2109  | 5  |
| IPR007075 | RNA polymerase Rpb1, domain 6                                            | 2407  | 5  |

|           |                                                                              |       |    |
|-----------|------------------------------------------------------------------------------|-------|----|
| IPR007131 | SLA1 homology domain 1, SHD1                                                 | 708   | 1  |
| IPR007137 | Protein of unknown function DUF348                                           | 850   | 1  |
| IPR007147 | Protein of unknown function DUF352                                           | 1145  | 2  |
| IPR007177 | Protein of unknown function DUF367                                           | 1119  | 5  |
| IPR007187 | Nucleoporin, Nup133-like, C-terminal                                         | 5000  | 5  |
| IPR007250 | Heat shock protein 9/12                                                      | 109   | 1  |
| IPR007337 | RelB antitoxin                                                               | 306   | 2  |
| IPR007342 | Indigoidine synthase A like protein                                          | 325   | 1  |
| IPR007517 | Rad50 zinc hook                                                              | 1487  | 5  |
| IPR007635 | Tis11B like protein, N-terminal                                              | 803   | 6  |
| IPR007638 | Glutaminyl-tRNA synthetase, class Ic, non-specific RNA-binding region part 2 | 988   | 4  |
| IPR007646 | RNA polymerase Rpb2, domain 4                                                | 6409  | 10 |
| IPR007698 | Alanine dehydrogenase/PNT, C-terminal                                        | 5057  | 11 |
| IPR007727 | Spo12                                                                        | 310   | 2  |
| IPR007775 | LST-1                                                                        | 370   | 4  |
| IPR007794 | Ribosome receptor lysine or proline rich                                     | 381   | 3  |
| IPR007830 |                                                                              | 253   | 1  |
| IPR007850 | RCSD                                                                         | 415   | 1  |
| IPR007860 | MutS II                                                                      | 8037  | 21 |
| IPR007861 | MutS IV                                                                      | 6368  | 20 |
| IPR007862 | Adenylate kinase, lid region                                                 | 1724  | 16 |
| IPR007886 | Alanine dehydrogenase/PNT, N-terminal                                        | 3300  | 8  |
| IPR007901 | MoeZ/MoeB                                                                    | 1405  | 5  |
| IPR007934 | Alpha-L-arabinofuranosidase B                                                | 551   | 3  |
| IPR008013 | GATA-type transcription activator, N-terminal                                | 2328  | 10 |
| IPR008042 | Retrotransposon, Pao                                                         | 418   | 1  |
| IPR008278 | 4'-phosphopantetheinyl transferase                                           | 1559  | 6  |
| IPR008403 | Apolipoprotein CIII                                                          | 216   | 2  |
| IPR008408 | Brain acid soluble protein 1                                                 | 674   | 3  |
| IPR008442 | Propeptide, carboxypeptidase Y                                               | 109   | 1  |
| IPR008454 | Collagen-binding surface protein Cna-like, B region                          | 6345  | 6  |
| IPR008539 | Protein of unknown function DUF821, CAP10-like                               | 1122  | 3  |
| IPR008626 | GAL11 transcriptional regulator                                              | 1081  | 1  |
| IPR008630 | Galactosyl transferase                                                       | 815   | 2  |
| IPR008640 | Hep/Hag                                                                      | 289   | 1  |
| IPR008671 | Lycopene beta and epsilon cyclase                                            | 477   | 1  |
| IPR008675 | Mating factor alpha precursor, N-terminal                                    | 285   | 2  |
| IPR008715 | NodS                                                                         | 310   | 1  |
| IPR008803 | Root hair defective 3 GTP-binding                                            | 764   | 3  |
| IPR008816 | Rickettsia 17 kDa surface antigen                                            | 80    | 1  |
| IPR008837 | Serendipity locus alpha                                                      | 1116  | 2  |
| IPR008850 | TEP1, N-terminal                                                             | 3239  | 4  |
| IPR008893 | WGR                                                                          | 3905  | 11 |
| IPR009223 | APC cysteine-rich                                                            | 8513  | 8  |
| IPR009224 | SAMP                                                                         | 5035  | 6  |
| IPR009232 | EB-1 binding                                                                 | 562   | 3  |
| IPR009234 | APC basic                                                                    | 4441  | 6  |
| IPR009240 | APC 15 residue                                                               | 1957  | 5  |
| IPR009255 | Transcriptional coactivation                                                 | 5219  | 8  |
| IPR009398 | Adenylate cyclase-like                                                       | 3527  | 22 |
| IPR009401 | TRAP240                                                                      | 16799 | 9  |
| IPR009435 | Acid shock                                                                   | 138   | 1  |
| IPR009449 | GDPGTP exchange factor Sec2p                                                 | 1894  | 8  |

|           |                                                              |       |    |
|-----------|--------------------------------------------------------------|-------|----|
| IPR009462 | Protein of unknown function DUF1086                          | 3275  | 14 |
| IPR009463 | Protein of unknown function DUF1087                          | 2304  | 14 |
| IPR009535 | Protein of unknown function DUF1154                          | 803   | 7  |
| IPR009581 | Protein of unknown function DUF1193                          | 3097  | 10 |
| IPR009644 | Fukutin-related                                              | 310   | 4  |
| IPR009651 | Aluminium resistance                                         | 336   | 1  |
| IPR009674 | RNA polymerase I, Rpa2 specific                              | 2839  | 5  |
| IPR009724 | Protein of unknown function DUF1301                          | 800   | 4  |
| IPR010011 | Protein of unknown function DUF1518                          | 4385  | 13 |
| IPR010407 | Signaling lymphocytic activation molecule, N-terminal        | 709   | 3  |
| IPR010456 | Ribosomal L11 methyltransferase                              | 708   | 4  |
| IPR010465 | DRF autoregulatory                                           | 730   | 14 |
| IPR010481 | CDC24 calponin                                               | 95    | 1  |
| IPR010482 | Integral peroxisomal membrane peroxin                        | 2531  | 5  |
| IPR010483 | Alpha-2-macroglobulin RAP, C-terminal                        | 1306  | 4  |
| IPR010491 | PRP1 splicing factor, N-terminal                             | 1770  | 6  |
| IPR010508 | Protein of unknown function DUF1088                          | 1783  | 7  |
| IPR010526 | Sodium ion transport-associated                              | 10214 | 40 |
| IPR010579 | MHC class I, alpha chain, C-terminal                         | 2307  | 38 |
| IPR010619 | Protein of unknown function DUF1212                          | 69    | 1  |
| IPR010643 | Protein of unknown function DUF1227                          | 2337  | 5  |
| IPR010656 | TRAP C4-dicarboxylate transport system permease DctM subunit | 605   | 1  |
| IPR010660 | Notch, NOD region                                            | 838   | 10 |
| IPR010684 | RNA polymerase II transcription factor SIII, subunit A       | 3216  | 8  |
| IPR010721 | Protein of unknown function DUF1295                          | 683   | 2  |
| IPR010729 | Ribosomal protein L47, mitochondrial                         | 1095  | 5  |
| IPR010822 | Sporulation stage II, protein E C-terminal                   | 255   | 1  |
| IPR010828 | Alcohol acetyltransferase                                    | 1060  | 2  |
| IPR010893 | Hydrogenase-1 expression HyaE                                | 144   | 1  |
| IPR010896 | Nuclease-associated modular DNA-binding 1                    | 148   | 1  |
| IPR011063 | PP-loop                                                      | 3501  | 11 |
| IPR011123 | Two component regulator three Y                              | 671   | 2  |
| IPR011422 | BRCA1-associated 2                                           | 1021  | 4  |
| IPR011424 | C1-like                                                      | 723   | 10 |
| IPR011430 | Down-regulated in metastasis                                 | 1878  | 5  |
| IPR011546 | Peptidase M41, FtsH extracellular                            | 3050  | 16 |
| IPR011645 | Heme NO binding associated                                   | 6266  | 19 |
| IPR011666 | Protein of unknown function DUF1604                          | 2893  | 4  |
| IPR011996 | Potassium channel, calcium-activated, SK, conserved region   | 5183  | 15 |
| IPR012280 | Semialdehyde dehydrogenase, dimerisation region              | 367   | 1  |
| IPR012435 | Protein of unknown function DUF1632                          | 1041  | 3  |
| IPR012496 | TMC                                                          | 7763  | 25 |
| IPR012508 | ATPase, A1 complex, epsilon subunit                          | 335   | 1  |
| IPR012529 | Attractin                                                    | 125   | 1  |
| IPR012532 | BDHCT                                                        | 446   | 3  |
| IPR012541 | DBP10CT                                                      | 672   | 6  |
| IPR012560 | FerA                                                         | 2604  | 10 |
| IPR012561 | FerB                                                         | 3533  | 22 |
| IPR012567 | IlvGEDA operon leader peptide                                | 38    | 1  |
| IPR012572 | Mad3-like                                                    | 469   | 2  |
| IPR012575 | MNLL subunit                                                 | 105   | 1  |

|           |                                                                  |       |     |
|-----------|------------------------------------------------------------------|-------|-----|
| IPR012581 | NUC156                                                           | 2168  | 4   |
| IPR012587 | P68HR                                                            | 563   | 4   |
| IPR012592 | PROCN                                                            | 9535  | 5   |
| IPR012599 | Peptidase C1A, propeptide                                        | 413   | 4   |
| IPR012603 | RBB1NT                                                           | 1547  | 8   |
| IPR012642 | Mitotic Wos2                                                     | 1819  | 8   |
| IPR012848 | Propeptide, peptidase A1                                         | 1936  | 27  |
| IPR012897 | Potassium channel, voltage dependent, Kv1.4, tandem inactivation | 216   | 2   |
| IPR012920 | Spb1, C-terminal                                                 | 2483  | 5   |
| IPR012923 | Replication fork protection component Swi3                       | 888   | 4   |
| IPR012934 | Zinc finger, AD-type                                             | 11288 | 92  |
| IPR012946 | X8                                                               | 347   | 2   |
| IPR012956 | CBF, N-terminal                                                  | 487   | 4   |
| IPR012962 | Peptidase M54, archaemetzincin                                   | 862   | 3   |
| IPR012966 | Protein of unknown function DUF1709, fungi                       | 306   | 1   |
| IPR012968 | Fer1                                                             | 5429  | 19  |
| IPR012979 | Protein of unknown function NUC189, C-terminal                   | 1585  | 5   |
| IPR012982 | PADR1                                                            | 1497  | 5   |
| IPR012996 | Zinc finger, CHHC-type                                           | 2277  | 12  |
| IPR013086 | Serotonin (5-HT) neurotransmitter transporter, N-terminal        | 208   | 3   |
| IPR013113 | FAD-binding 9, siderophore-interacting                           | 628   | 5   |
| IPR013124 | Gap junction alpha-1 protein (Cx43), C-terminal                  | 197   | 4   |
| IPR013125 | Gap junction alpha-8 protein (Cx50), C-terminal                  | 222   | 2   |
| IPR013180 | Protein of unknown function DUF1716, eukaryotic                  | 2143  | 4   |
| IPR013182 | Protein of unknown function DUF1720                              | 764   | 2   |
| IPR013221 | Mur ligase, central                                              | 366   | 1   |
| IPR013223 | Ribonuclease B, OB region N-terminal                             | 835   | 7   |
| IPR013226 | Pal1 cell morphology                                             | 865   | 2   |
| IPR013235 | Serine/threonine phosphatase, PPP5                               | 1779  | 16  |
| IPR013253 | Kinetochore Spc7                                                 | 917   | 1   |
| IPR013257 | SRI, Set2 Rpb1 interacting                                       | 129   | 1   |
| IPR013498 | DNA topoisomerase, type IA, zn finger                            | 532   | 4   |
| IPR013511 |                                                                  | 622   | 2   |
| IPR013513 | Integrin alpha chain, C-terminal cytoplasmic region              | 6139  | 53  |
| IPR013530 | Protein-arginine deiminase, C-terminal                           | 8264  | 15  |
| IPR013538 | Activator of Hsp90 ATPase homologue 1-like                       | 1169  | 6   |
| IPR013544 | Protein of unknown function DUF1725                              | 15351 | 305 |
| IPR013566 | EF hand associated, type-1                                       | 3080  | 10  |
| IPR013592 | Maf transcription factor, N-terminal                             | 1893  | 12  |
| IPR013600 | Ly49-like N-terminal                                             | 7387  | 45  |
| IPR013612 | Amino acid permease N-terminal                                   | 1754  | 16  |
| IPR013621 | Ion transport N-terminal                                         | 4014  | 13  |
| IPR013629 | Zinc finger-associated region                                    | 905   | 9   |
| IPR013646 | GTPase of unknown function C-terminal                            | 206   | 1   |
| IPR013656 | PAS fold-4                                                       | 427   | 3   |
| IPR013662 | RyR and IP3R Homology associated                                 | 36468 | 26  |
| IPR013665 | Sfi1 spindle body                                                | 656   | 1   |
| IPR013673 | Potassium channel, inwardly rectifying,                          | 1851  | 6   |

|           |                                                                            |      |    |
|-----------|----------------------------------------------------------------------------|------|----|
|           | Kir, N-terminal                                                            |      |    |
| IPR013680 | Voltage-dependent calcium channel, alpha-2/delta subunit, conserved region | 5782 | 8  |
| IPR013697 | Region of unknown function DUF1744                                         | 9292 | 6  |
| IPR013705 | Sterol methyltransferase C-terminal                                        | 383  | 1  |
| IPR013706 | 3'5'-cyclic nucleotide phosphodiesterase N-terminal                        | 1445 | 15 |
| IPR013716 | Adenylate cyclase G-alpha binding                                          | 67   | 1  |
| IPR013732 | Protein-arginine deiminase (PAD) N-terminal                                | 2565 | 16 |
| IPR013743 | Nap binding NBP1, fungi                                                    | 540  | 2  |
| IPR013747 | 3-Oxoacyl-[acyl-carrier-protein (ACP)] synthase III C-terminal             | 900  | 8  |
| IPR013798 | Indole-3-glycerol phosphate synthase                                       | 427  | 1  |
| IPR013803 | Amyloidogenic glycoprotein, amyloid-beta peptide                           | 1058 | 3  |
| IPR013851 | Transcription factor Otx, C-terminal                                       | 664  | 5  |
